# Supplementary material for: The characterization of protein interactions – what, how and how much?
Source: Royal Society of Chemistry journal article supplement (doi:10.1039/d1cs00548k), 2021-01-01
Supplement: d1cs00548k1.pdf [file d1cs00548k1.pdf]

|                                       | Technique   | Sample Requirements                                                                           | Key References                                         | Advantages                                            | Disadvantages                                                                                                                           |
|---------------------------------------|-------------|-----------------------------------------------------------------------------------------------|--------------------------------------------------------|-------------------------------------------------------|-----------------------------------------------------------------------------------------------------------------------------------------|
| De novo interaction ID and validation | Y2H         | Cell based – requires a set of plasmids encoding all proteins to be screened                  | (Mehla, Caufield, and Uetz 2015)                       | * Identifies direct interactions proteome-wide        | * Requires significant cloning to set up                                                                                                |
|                                       | AP-MS       | Coomassie staining: 20–50 ng, Sypro Ruby: 1–5 ng, Western blotting: 0.1 ng (per protein band) | (Keilhauer, Hein, and Mann 2015)                       | * Simple MS setup available in most facilities        | * Bridging by, for example, DNA can be an issue<br>* Not quantitative<br>* Not good to ID weak, transient interactions                  |
|                                       | Bio-ID/APEX |                                                                                               | (Roux et al. 2018)                                     | * Can detect weak, transient interactions             | * High background<br>* APEX requires H <sub>2</sub> O <sub>2</sub> , restricting its use in some cell types and <i>in vivo</i> contexts |
|                                       | Pulldowns   | 1–10 mg total input protein (0.01–1 µg total protein after affinity enrichment)               | (Louche, Salcedo, and Bigot 2017)                      | * Simple set-up<br>* No specialist equipment required | * Difficult to validate weak, transient interactions<br>* Requires access to good antibodies or tagged protein                          |
| Stoichiometry                         | SEC         | 20–100 µg purified protein at 5–20 µM                                                         | (Sahin and Roberts 2012; Gell, Grant, and Mackay 2012) | * Simple set-up                                       | * Elution volume dependent on molecular shape                                                                                           |
|                                       | SEC-MALLS   | Size dependent: 10–50 µg for species > 40 kDa                                                 | (Folta-Stogniew 2006)                                  | * Allows molecular weight determination               | * Complexes with intermediate or low affinity will partially dissociate at typical concentrations, introducing ambiguity                |
|                                       | DLS         | Size dependent: 10–50 µg for species > 40 kDa                                                 | (Stetefeld, McKenna, and Patel 2016)                   | * Quick method to assess sample homogeneity           | * Molecular weight estimation inaccurate as relies on Stokes radius which is shape dependent                                            |

|                           |                                       |                                                                                                                                               |                                               |                                                                                                                     |                                                                                                                                                                                                                  |
|---------------------------|---------------------------------------|-----------------------------------------------------------------------------------------------------------------------------------------------|-----------------------------------------------|---------------------------------------------------------------------------------------------------------------------|------------------------------------------------------------------------------------------------------------------------------------------------------------------------------------------------------------------|
|                           | <b>SAXS</b>                           | 50–100 $\mu\text{L}$ at $\sim 5$ mg/mL                                                                                                        | (Hura et al. 2009)                            | * Gives information on molecular shape                                                                              | * High concentrations required can lead to aggregation                                                                                                                                                           |
|                           | <b>Mass photometry</b>                | <1 ng protein                                                                                                                                 | (Soltermann et al. 2020; Young et al. 2018)   | * Single molecule detection<br>* Can determine binding constants and molecular weights<br>* Low sample requirements | * Lower mass precision than MS techniques                                                                                                                                                                        |
|                           | <b>Native MS</b>                      | 10–100 $\mu\text{L}$ of 1–10 $\mu\text{M}$ protein                                                                                            | (Snijder and Heck 2014; Donnelly et al. 2019) | * Very high mass precision                                                                                          | * Complex must be stable in MS-compatible buffers, such as ammonium bicarbonate<br>* Specialist MS setup required                                                                                                |
|                           | <b>Analytical ultracentrifugation</b> | 200–400 $\mu\text{L}$ @ A280 = 1.0 (absorbance optics), 0.1 mg/mL (interference optics), 100 pM (fluorescence optics)                         | (Cole et al. 2008)                            | * Can use complex mixtures e.g. lipids                                                                              | * Challenging for heterotypic interactions<br>* Not useful for complexes with small ligands                                                                                                                      |
| <b>Binding affinities</b> | <b>ITC</b>                            | 2–300 $\mu\text{L}$ @ 10 $\mu\text{M}$ P and 2 x $\sim 60$ $\mu\text{L}$ @ 100 $\mu\text{M}$ L for one titration and an L into buffer control | (Freyer and Lewis 2008)                       | * Widely applicable<br>* Can determine thermodynamic parameters                                                     | * Enthalpy change is limiting factor for signal to noise<br>* Sample components that cause a heat change interfere with the experiment<br>* Very sensitive to buffer mismatch<br>* High protein requirement      |
|                           | <b>SPR</b>                            | 1–10 $\mu\text{g}$ ligand and 30 $\mu\text{L}$ analyte at each concentration (optimising ligand immobilisation level is critical)             | (Nikolovska-Coleska 2015)                     | * Gives kinetic, as well as equilibrium, data<br>* Low protein requirements                                         | * Disposable biosensors expensive<br>* Non-specific sensor binding can interfere<br>* Very sensitive to buffer mismatch<br>* Can be difficult to measure binding of small molecules to large immobilized species |

|                                          |                                                                                                                                            |                                            |                                                                                                                                                                                                                    |                                                                                                                                                                                                                                           |
|------------------------------------------|--------------------------------------------------------------------------------------------------------------------------------------------|--------------------------------------------|--------------------------------------------------------------------------------------------------------------------------------------------------------------------------------------------------------------------|-------------------------------------------------------------------------------------------------------------------------------------------------------------------------------------------------------------------------------------------|
| <b>BLI</b>                               | Ligand loading 50–100 nM, 200 $\mu$ L analyte per well (for 96 well plate) (optimising ligand immobilisation level is critical)            | (Abdiche et al. 2008)                      | <ul style="list-style-type: none"> <li>* Gives kinetic, as well as equilibrium, data</li> <li>* Sensitive to binding of small ligands (down to 150 Da)</li> </ul>                                                  | <ul style="list-style-type: none"> <li>* Disposable biosensors tips relatively expensive</li> <li>* Non-specific sensor binding can interfere</li> </ul>                                                                                  |
| <b>Intrinsic tryptophan fluorescence</b> | low $\mu$ M quantities of protein, [ligand] 10-fold either side of $K_D$ (volume depends on assay setup, <i>i.e.</i> , cuvette vs plate)   | (Lakowicz 2006)                            | <ul style="list-style-type: none"> <li>* Cheap and straightforward to perform</li> <li>* Binding affinities are relative</li> </ul>                                                                                | <ul style="list-style-type: none"> <li>* Requires appropriately positioned tryptophan</li> <li>* Analysis can be complicated if multiple tryptophan residues are present</li> <li>* Fluorescent binding partners can interfere</li> </ul> |
| <b>MST</b>                               | 80 $\mu$ L fluorescently labelled protein/ligand @ 10–50 nM                                                                                | (Jerabek-Willemsen et al. 2011)            | <ul style="list-style-type: none"> <li>* Wide range of compatible binding partners</li> <li>* No significant size limits</li> </ul>                                                                                | <ul style="list-style-type: none"> <li>* Protein binding to capillary walls can interfere (different capillary coatings can ameliorate this)</li> </ul>                                                                                   |
| <b>FA/FP</b>                             | 1–100 nM labelled ligand, binding partner 10–100-fold either side of $K_D$ (volume depends on assay setup, <i>i.e.</i> , cuvette vs plate) | (Rossi and Taylor 2011)                    | <ul style="list-style-type: none"> <li>* Cheap and easy to perform</li> <li>* Relatively easy to adapt to HTS</li> </ul>                                                                                           | <ul style="list-style-type: none"> <li>* Fluorescent ligands can interfere</li> <li>* Requires large size change on complex formation</li> </ul>                                                                                          |
| <b>FRET/BRET</b>                         | Partners must be at similar concentrations so that background fluorescence doesn't dominate the signal                                     | (Kobayashi et al. 2019; Algar et al. 2019) | <ul style="list-style-type: none"> <li>* Can be performed in cells or <i>in vitro</i></li> <li>* Can measure exact distances</li> </ul>                                                                            | <ul style="list-style-type: none"> <li>* Requires dual labelling (fluorescent pairs must be carefully chosen)</li> </ul>                                                                                                                  |
| <b>AlphaScreen/LISA</b>                  | Small quantities of suitably tagged P and L for binding to acceptor and donor beads                                                        | (Yasgar et al. 2016)                       | <ul style="list-style-type: none"> <li>* Compatible with a wide range of complex media</li> <li>* Easily adapted to high-throughput screening</li> </ul>                                                           | <ul style="list-style-type: none"> <li>* Requires specialist fluorescence plate reader</li> <li>* Signal is temperature sensitive</li> <li>* Beads are light sensitive</li> </ul>                                                         |
| <b>DSF</b>                               | 10 $\mu$ g protein per replicate, 10–20 molar excess ligand                                                                                | (Gao, Oerlemans, and Groves 2020)          | <ul style="list-style-type: none"> <li>* Binding affinities are usually relative unless performed in an isothermal setup</li> <li>* Easy to screen large ligand sets</li> <li>* Low sample requirements</li> </ul> | <ul style="list-style-type: none"> <li>* Fluorescent ligands can interfere</li> <li>* Difficult to interpret for multidomain proteins</li> </ul>                                                                                          |

|                        |               |                               |                                                 |                                                                                                                                                                             |                                                                                                                                                                         |
|------------------------|---------------|-------------------------------|-------------------------------------------------|-----------------------------------------------------------------------------------------------------------------------------------------------------------------------------|-------------------------------------------------------------------------------------------------------------------------------------------------------------------------|
| Structural information | <b>XL-MS</b>  | 10–100 µg protein of interest | (Steigenberger et al. 2020; Klykov et al. 2018) | <ul style="list-style-type: none"> <li>* Can be applied to wide range of samples</li> <li>* Relatively limited technical requirements</li> </ul>                            | * Effect of protein flexibility on XL-MS data not well understood                                                                                                       |
|                        | <b>HDX-MS</b> | nanomole quantities @ <1 µM   | (Hodge, Benhaim, and Lee 2020)                  | <ul style="list-style-type: none"> <li>* Can be used for large, multi-component complexes</li> <li>* Low sample requirement compared to many biophysical methods</li> </ul> | <ul style="list-style-type: none"> <li>* Peptide rather than residue level resolution</li> <li>* Requires relatively sophisticated setup and expert analysis</li> </ul> |

- Abdiche, Yasmina, Dan Malashock, Alanna Pinkerton, and Jaume Pons. 2008. "Determining Kinetics and Affinities of Protein Interactions Using a Parallel Real-Time Label-Free Biosensor, the Octet." *Analytical Biochemistry* 377 (2): 209–17. <https://doi.org/10.1016/j.ab.2008.03.035>.
- Algar, W. Russ, Niko Hildebrandt, Steven S. Vogel, and Igor L. Medintz. 2019. "FRET as a Biomolecular Research Tool — Understanding Its Potential While Avoiding Pitfalls." *Nature Methods* 16 (9): 815–29. <https://doi.org/10.1038/s41592-019-0530-8>.
- Cole, James L, Jeffrey W Lary, Thomas P Moody, and Thomas M Laue. 2008. "Analytical Ultracentrifugation: Sedimentation Velocity and Sedimentation Equilibrium." *Methods in Cell Biology* 84: 143–79. [https://doi.org/10.1016/S0091-679X\(07\)84006-4](https://doi.org/10.1016/S0091-679X(07)84006-4).
- Donnelly, Daniel P, Catherine M Rawlins, Caroline J DeHart, Luca Fornelli, Luis F Schachner, Ziqing Lin, Jennifer L Lippens, et al. 2019. "Best Practices and Benchmarks for Intact Protein Analysis for Top-down Mass Spectrometry." *Nature Methods* 16 (7): 587–94. <https://doi.org/10.1038/s41592-019-0457-0>.
- Folta-Stogniew, Ewa. 2006. "Oligomeric States of Proteins Determined by Size-Exclusion Chromatography Coupled With Light Scattering, Absorbance, and Refractive Index Detectors BT - New and Emerging Proteomic Techniques." In , edited by Dobrin Nedelkov and Randall W Nelson, 97–112. Totowa, NJ: Humana Press. <https://doi.org/10.1385/1-59745-026-X:97>.
- Freyer, Matthew W, and Edwin A B T - Methods in Cell Biology Lewis. 2008. "Isothermal Titration Calorimetry: Experimental Design, Data Analysis, and Probing Macromolecule/Ligand Binding and Kinetic Interactions." In *Biophysical Tools for Biologists, Volume One: In Vitro Techniques*, 84:79–113. Academic Press. [https://doi.org/https://doi.org/10.1016/S0091-679X\(07\)84004-0](https://doi.org/https://doi.org/10.1016/S0091-679X(07)84004-0).
- Gao, Kai, Rick Oerlemans, and Matthew R Groves. 2020. "Theory and Applications of Differential Scanning Fluorimetry in Early-Stage Drug Discovery." *Biophysical Reviews* 12 (1): 85–104. <https://doi.org/10.1007/s12551-020-00619-2>.
- Gell, David A, Richard P Grant, and Joel P Mackay. 2012. "The Detection and Quantitation of Protein Oligomerization." In *Protein Dimerization and Oligomerization in Biology*, edited by Jacqueline M Matthews, 19–41. New York, NY: Springer New York. [https://doi.org/10.1007/978-1-4614-3229-6\\_2](https://doi.org/10.1007/978-1-4614-3229-6_2).
- Hodge, Edgar A, Mark A Benhaim, and Kelly K Lee. 2020. "Bridging Protein Structure, Dynamics, and Function Using Hydrogen/Deuterium-Exchange Mass Spectrometry." *Protein Science* 29 (4): 843–55. <https://doi.org/10.1002/pro.3790>.

- Hura, Greg L, Angeli L Menon, Michal Hammel, Robert P Rambo, Farris L Poole II, Susan E Tsutakawa, Francis E Jenney Jr, et al. 2009. "Robust, High-Throughput Solution Structural Analyses by Small Angle X-Ray Scattering (SAXS)." *Nature Methods* 6 (8): 606–12. <https://doi.org/10.1038/nmeth.1353>.
- Jerabek-Willemsen, Moran, Christoph J Wienken, Dieter Braun, Philipp Baaske, and Stefan Duhr. 2011. "Molecular Interaction Studies Using Microscale Thermophoresis." *Assay and Drug Development Technologies* 9 (4): 342–53. <https://doi.org/10.1089/adt.2011.0380>.
- Keilhauer, Eva C, Marco Y Hein, and Matthias Mann. 2015. "Accurate Protein Complex Retrieval by Affinity Enrichment Mass Spectrometry (AE-MS) Rather than Affinity Purification Mass Spectrometry (AP-MS)." *Molecular & Cellular Proteomics* 14 (1): 120–35. <https://doi.org/10.1074/mcp.M114.041012>.
- Klykov, Oleg, Barbara Steigenberger, Sibel Pektaş, Domenico Fasci, Albert J R Heck, and Richard A Scheltema. 2018. "Efficient and Robust Proteome-Wide Approaches for Cross-Linking Mass Spectrometry." *Nature Protocols* 13 (12): 2964–90. <https://doi.org/10.1038/s41596-018-0074-x>.
- Kobayashi, Hiroyuki, Louis-Philippe Picard, Anne-Marie Schönegege, and Michel Bouvier. 2019. "Bioluminescence Resonance Energy Transfer–Based Imaging of Protein–Protein Interactions in Living Cells." *Nature Protocols* 14 (4): 1084–1107. <https://doi.org/10.1038/s41596-019-0129-7>.
- Lakowicz, Joseph R. 2006. "Protein Fluorescence." In *Principles of Fluorescence Spectroscopy*, 529–75. Springer, Boston, MA. [https://doi.org/https://doi.org/10.1007/978-0-387-46312-4\\_16](https://doi.org/https://doi.org/10.1007/978-0-387-46312-4_16).
- Louche, Arthur, Suzana P Salcedo, and Sarah Bigot. 2017. "Protein-Protein Interactions: Pull-Down Assays." *Methods in Molecular Biology (Clifton, N.J.)* 1615: 247–255. [https://doi.org/10.1007/978-1-4939-7033-9\\_20](https://doi.org/10.1007/978-1-4939-7033-9_20).
- Mehla, Jitender, J. Harry Caufield, and Peter Uetz. 2015. "The Yeast Two-Hybrid System: A Tool for Mapping Protein-Protein Interactions." *Cold Spring Harbor Protocols* 2015 (5): 425–30. <https://doi.org/10.1101/pdb.top083345>.
- Nikolovska-Coleska, Zaneta. 2015. "Studying Protein-Protein Interactions Using Surface Plasmon Resonance." In *Protein-Protein Interactions*, edited by Cheryl L Meyerkord and Haiyan Fu, 109–38. New York, NY: Springer New York. [https://doi.org/10.1007/978-1-4939-2425-7\\_7](https://doi.org/10.1007/978-1-4939-2425-7_7).
- Rossi, Ana M, and Colin W Taylor. 2011. "Analysis of Protein-Ligand Interactions by Fluorescence Polarization." *Nature Protocols* 6 (3): 365–87. <https://doi.org/10.1038/nprot.2011.305>.
- Roux, Kyle J, Dae In Kim, Brian Burke, and Danielle G May. 2018. "BioID: A Screen for Protein-Protein Interactions." *Current Protocols in Protein Science* 91 (1): 19.23.1-19.23.15. <https://doi.org/10.1002/cpps.51>.
- Sahin, Erinc, and Christopher J Roberts. 2012. "Size-Exclusion Chromatography with Multi-Angle Light Scattering for Elucidating Protein Aggregation Mechanisms." In *Therapeutic Proteins: Methods and Protocols*, edited by Vladimir Voynov and Justin A Caravella, 403–23. Totowa, NJ: Humana Press. [https://doi.org/10.1007/978-1-61779-921-1\\_25](https://doi.org/10.1007/978-1-61779-921-1_25).
- Snijder, Joost, and Albert J R Heck. 2014. "Analytical Approaches for Size and Mass Analysis of Large Protein Assemblies." *Annual Review of Analytical Chemistry* 7 (1): 43–64. <https://doi.org/10.1146/annurev-anchem-071213-020015>.
- Soltermann, Fabian, Eric D.B. Foley, Veronica Pagnoni, Martin Galpin, Justin L.P. Benesch, Philipp Kukura, and Weston B. Struwe. 2020. "Quantifying Protein–Protein Interactions by Molecular Counting with Mass Photometry." *Angewandte Chemie - International Edition* 59 (27): 10774–79. <https://doi.org/10.1002/anie.202001578>.
- Steigenberger, B, P Albanese, A J R Heck, and R A Scheltema. 2020. "To Cleave or Not To Cleave in XL-MS?" *Journal of the American Society for Mass Spectrometry* 31 (2): 196–206. <https://doi.org/10.1021/jasms.9b00085>.
- Stetefeld, Jörg, Sean A McKenna, and Trushar R Patel. 2016. "Dynamic Light Scattering: A Practical Guide and Applications in Biomedical Sciences."

*Biophysical Reviews* 8 (4): 409–27. <https://doi.org/10.1007/s12551-016-0218-6>.

Yasgar, Adam, Ajit Jadhav, Anton Simeonov, and Nathan P. Coussens. 2016. “AlphaScreen-Based Assays: Ultra-High-Throughput Screening for Small-Molecule Inhibitors of Challenging Enzymes and Protein-Protein Interactions Adam.” *Methods Mol. Biol.* 1439: 77–98. <https://doi.org/10.1007/978-1-4939-3673-1>.

Young, Gavin, Nikolas Hundt, Daniel Cole, Adam Fineberg, Joanna Andrecka, Andrew Tyler, Anna Olerinyova, et al. 2018. “Quantitative Mass Imaging of Single Molecules in Solution.” *Science* 360: 423–27. <https://doi.org/10.1101/229740>.
